# Supplementary figures and images for: A retrospective study of the pre-eruptive unrest on El Hierro (Canary Islands): implications of seismicity and deformation in the short-term volcanic hazard assessment
Source: Copernicus journal article supplement (doi:10.5194/nhess-2017-243), 2017-07-10

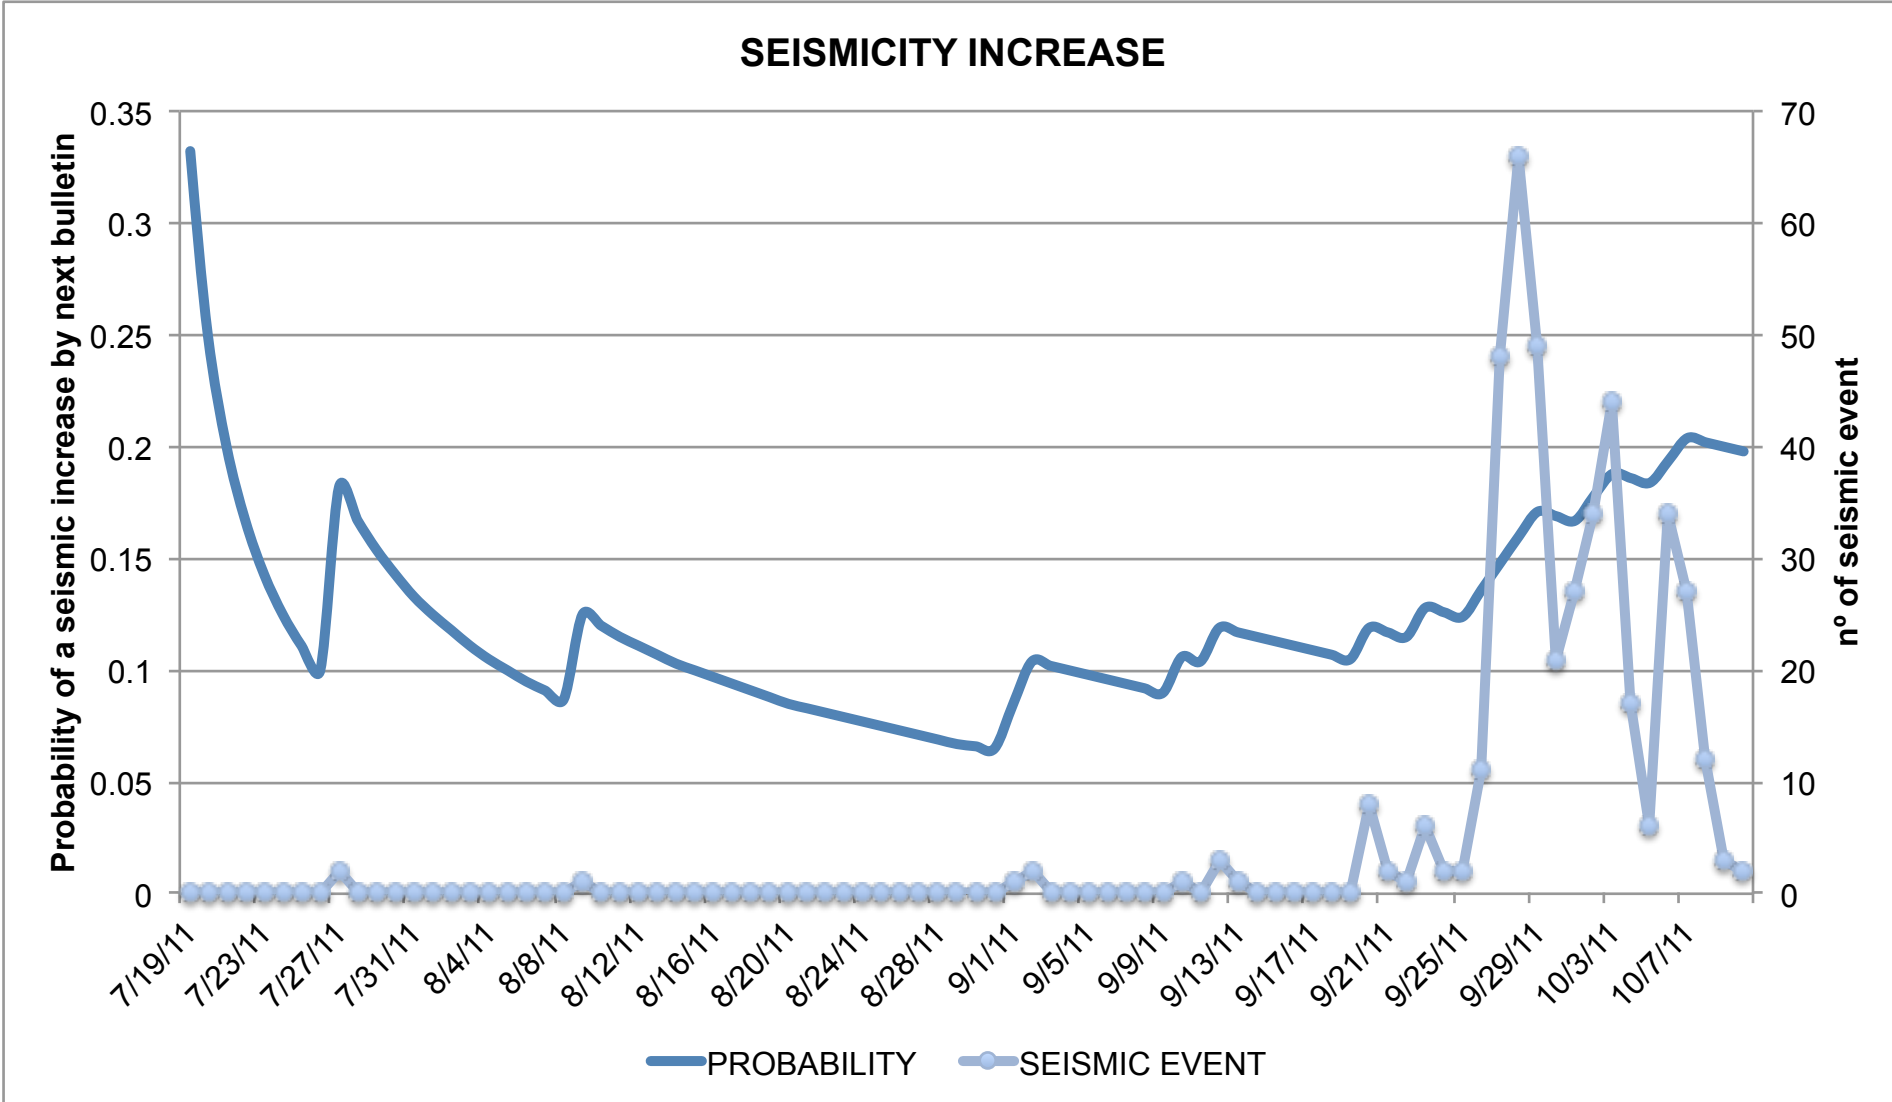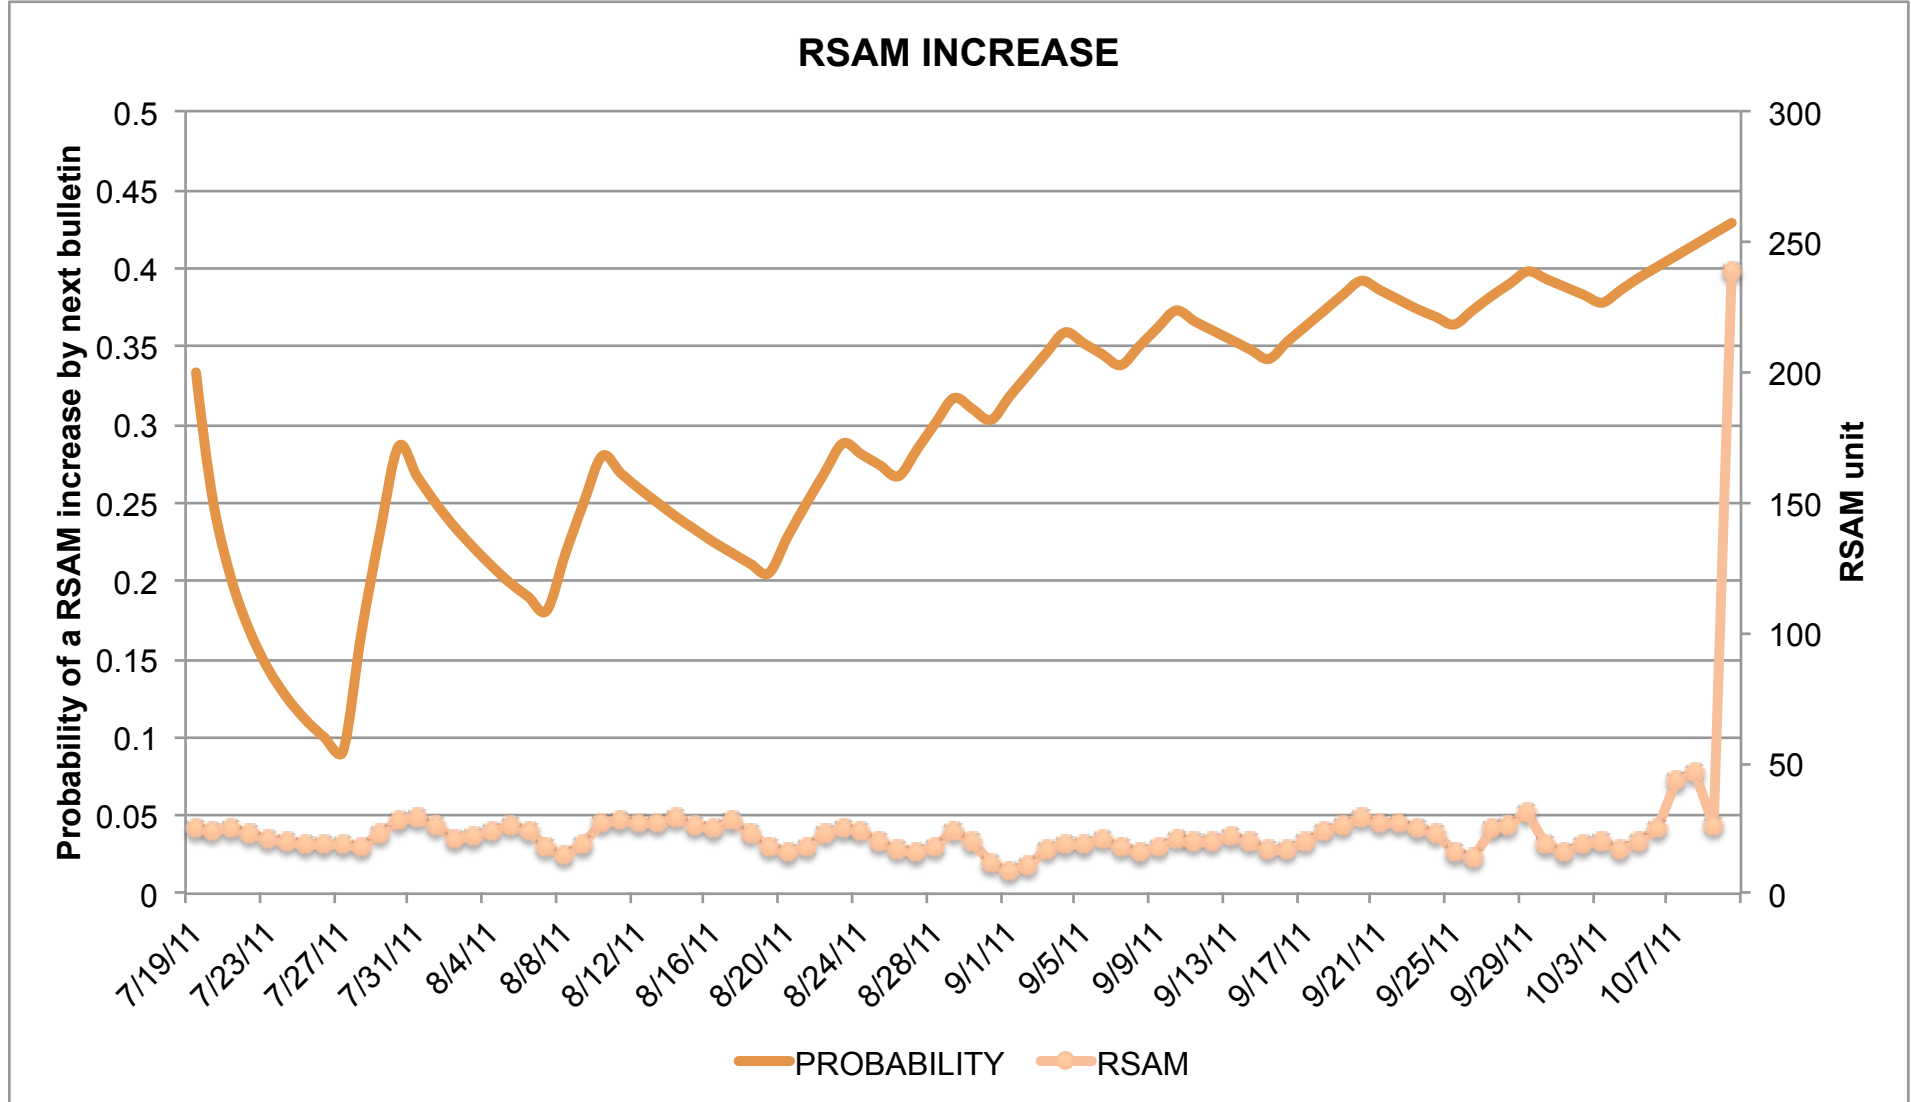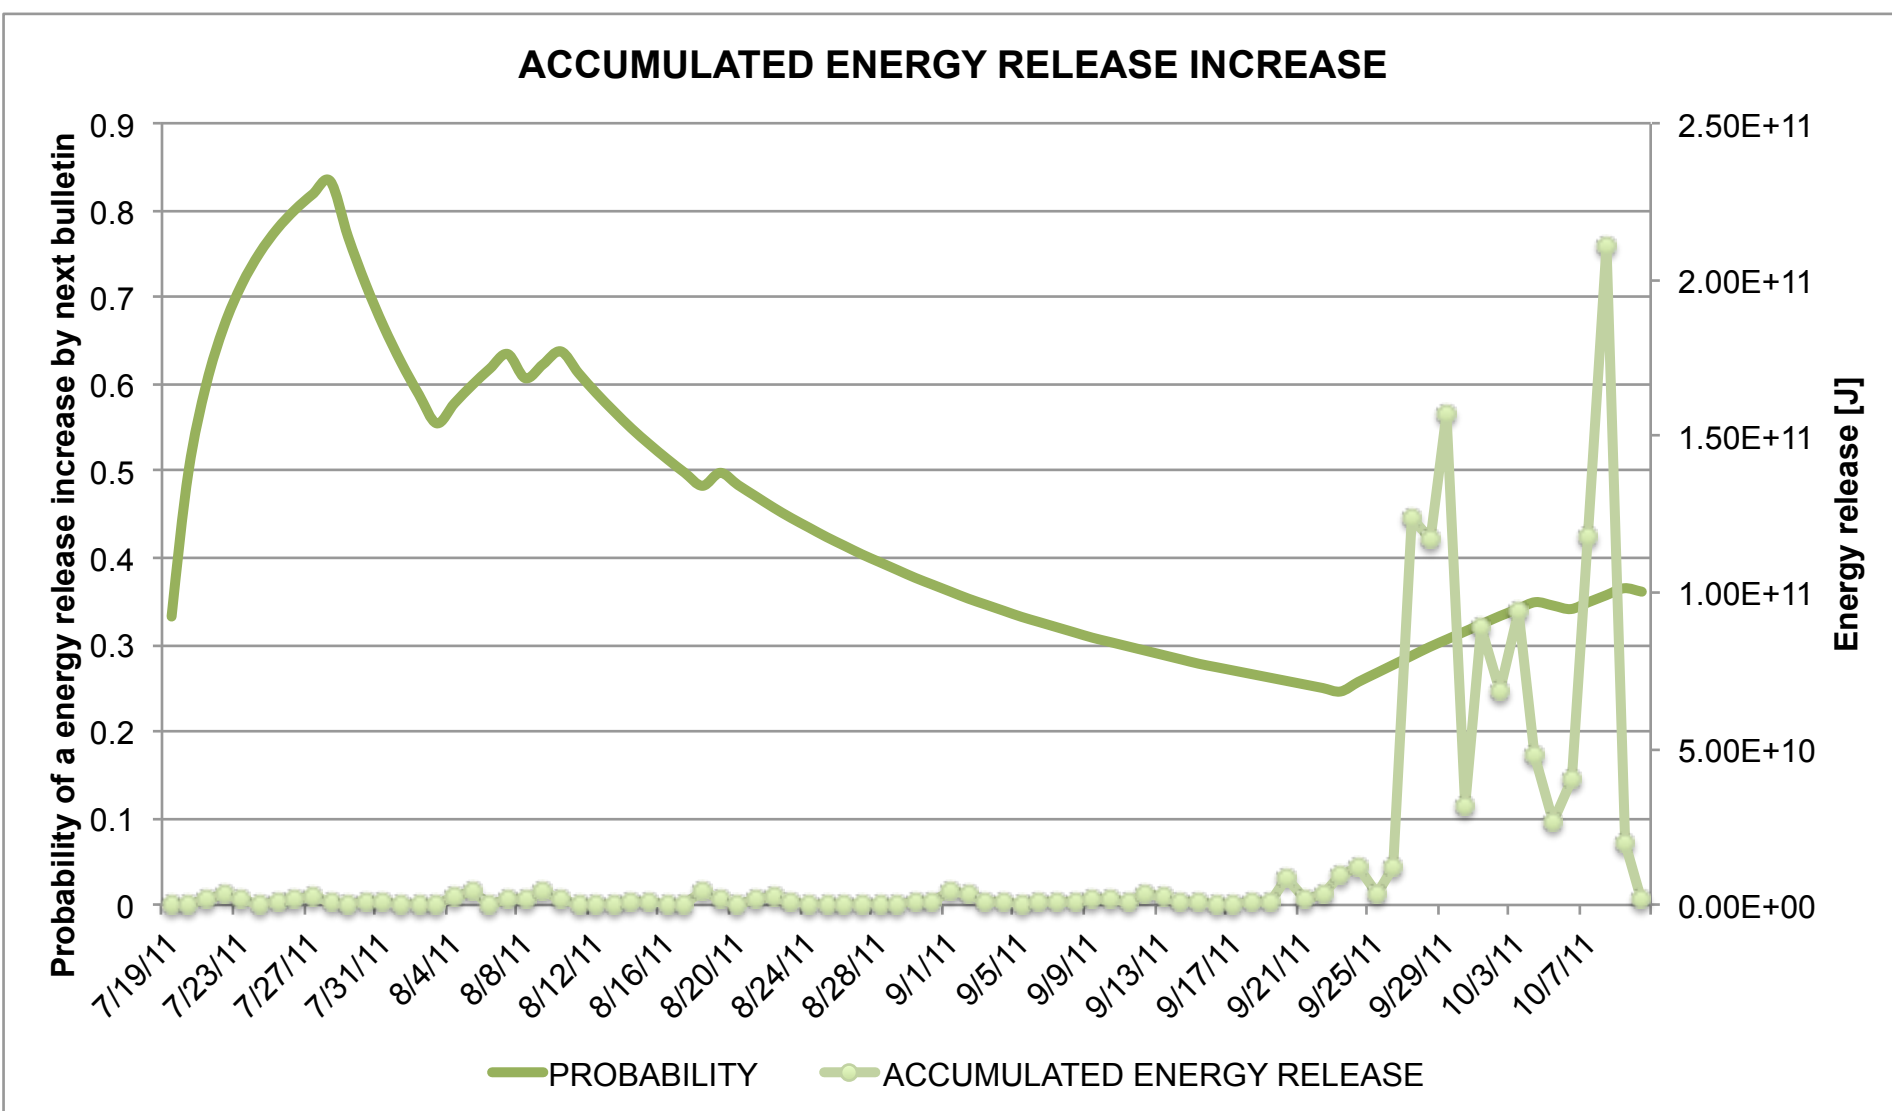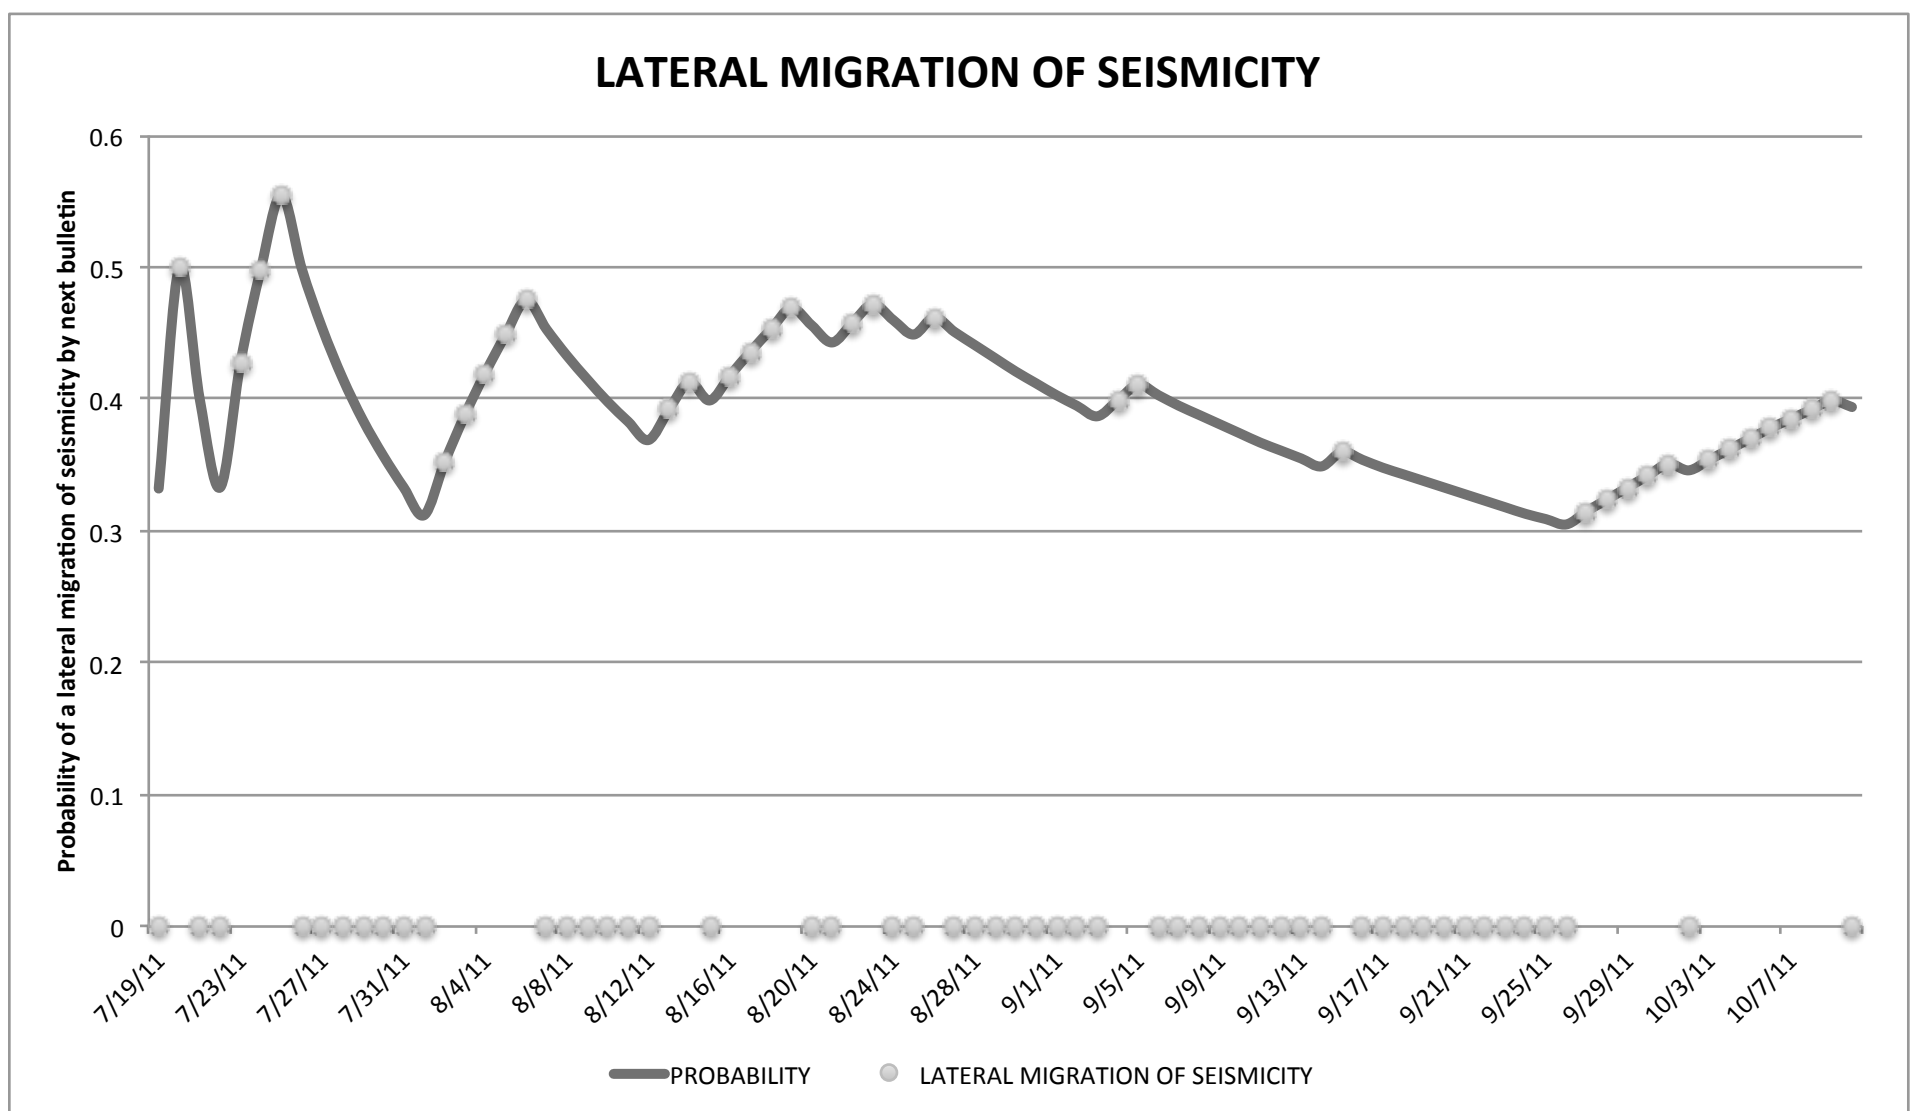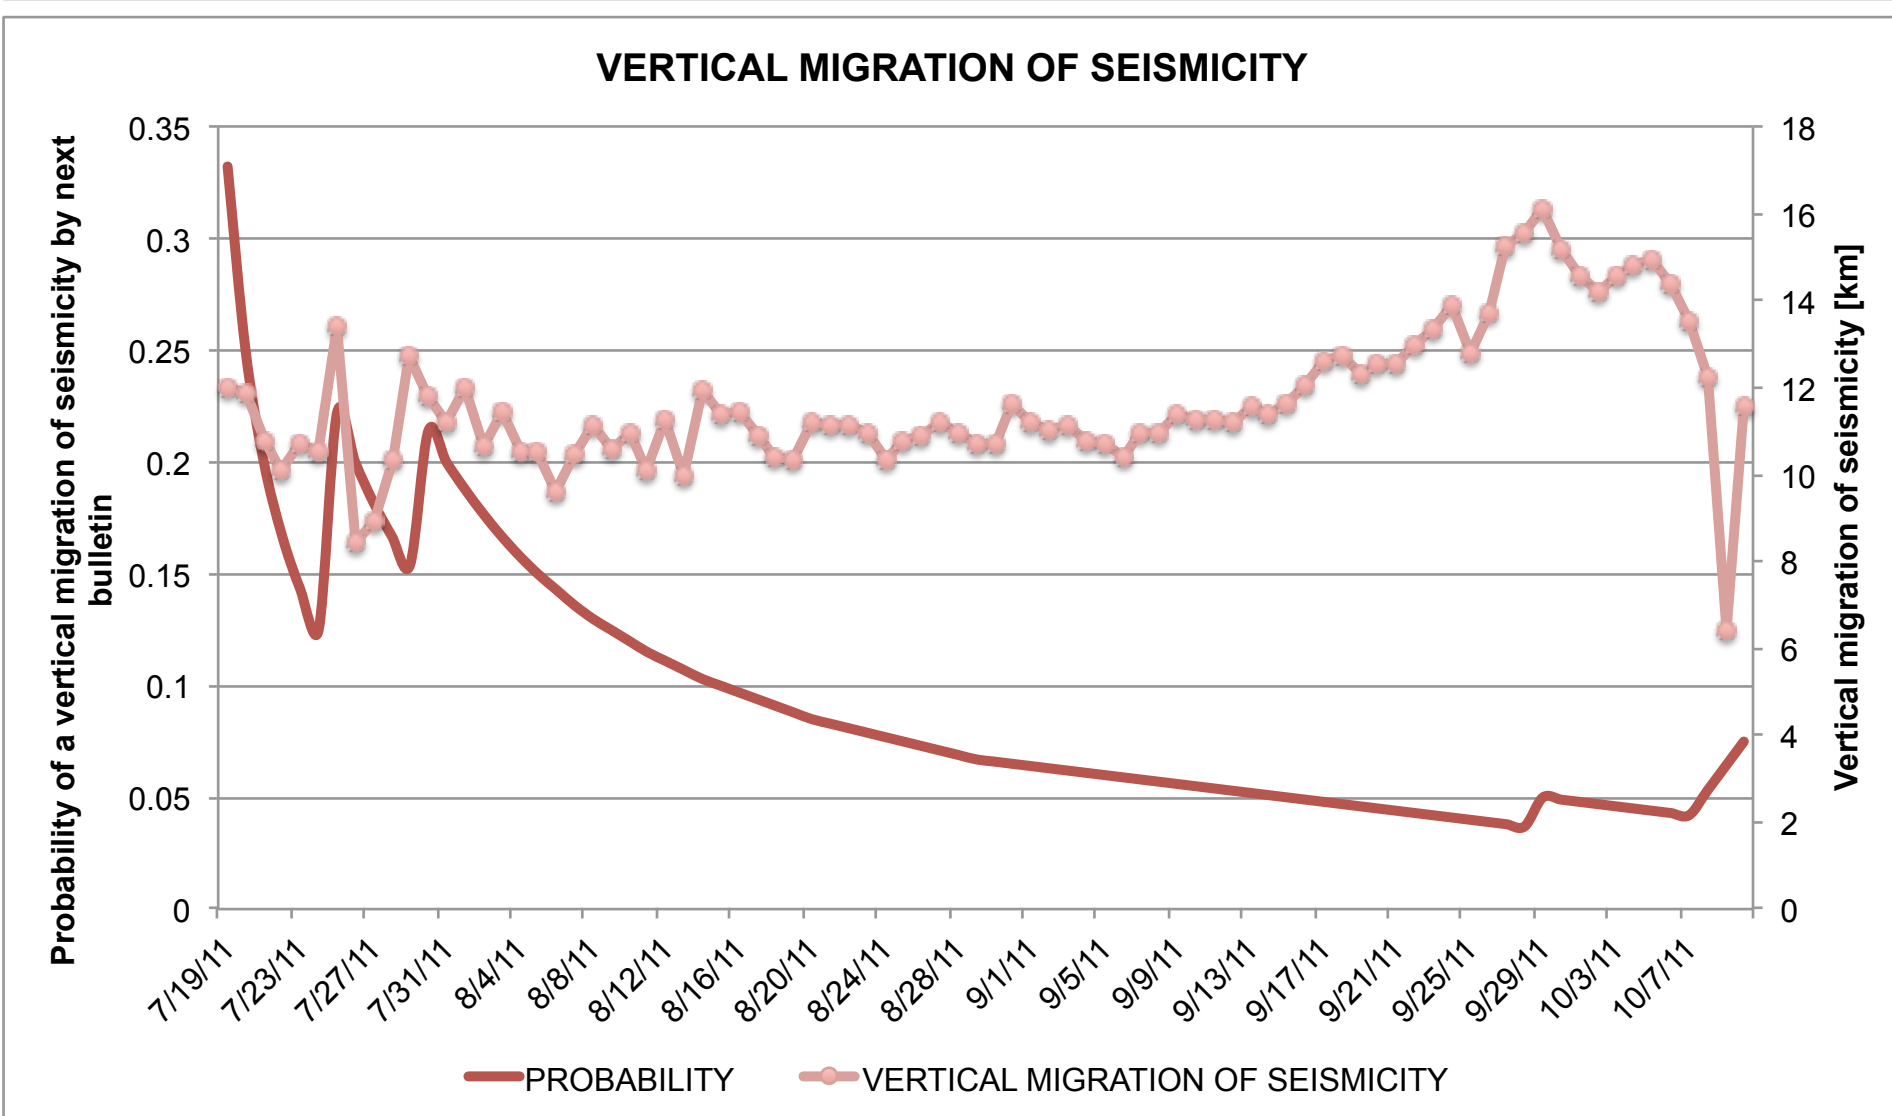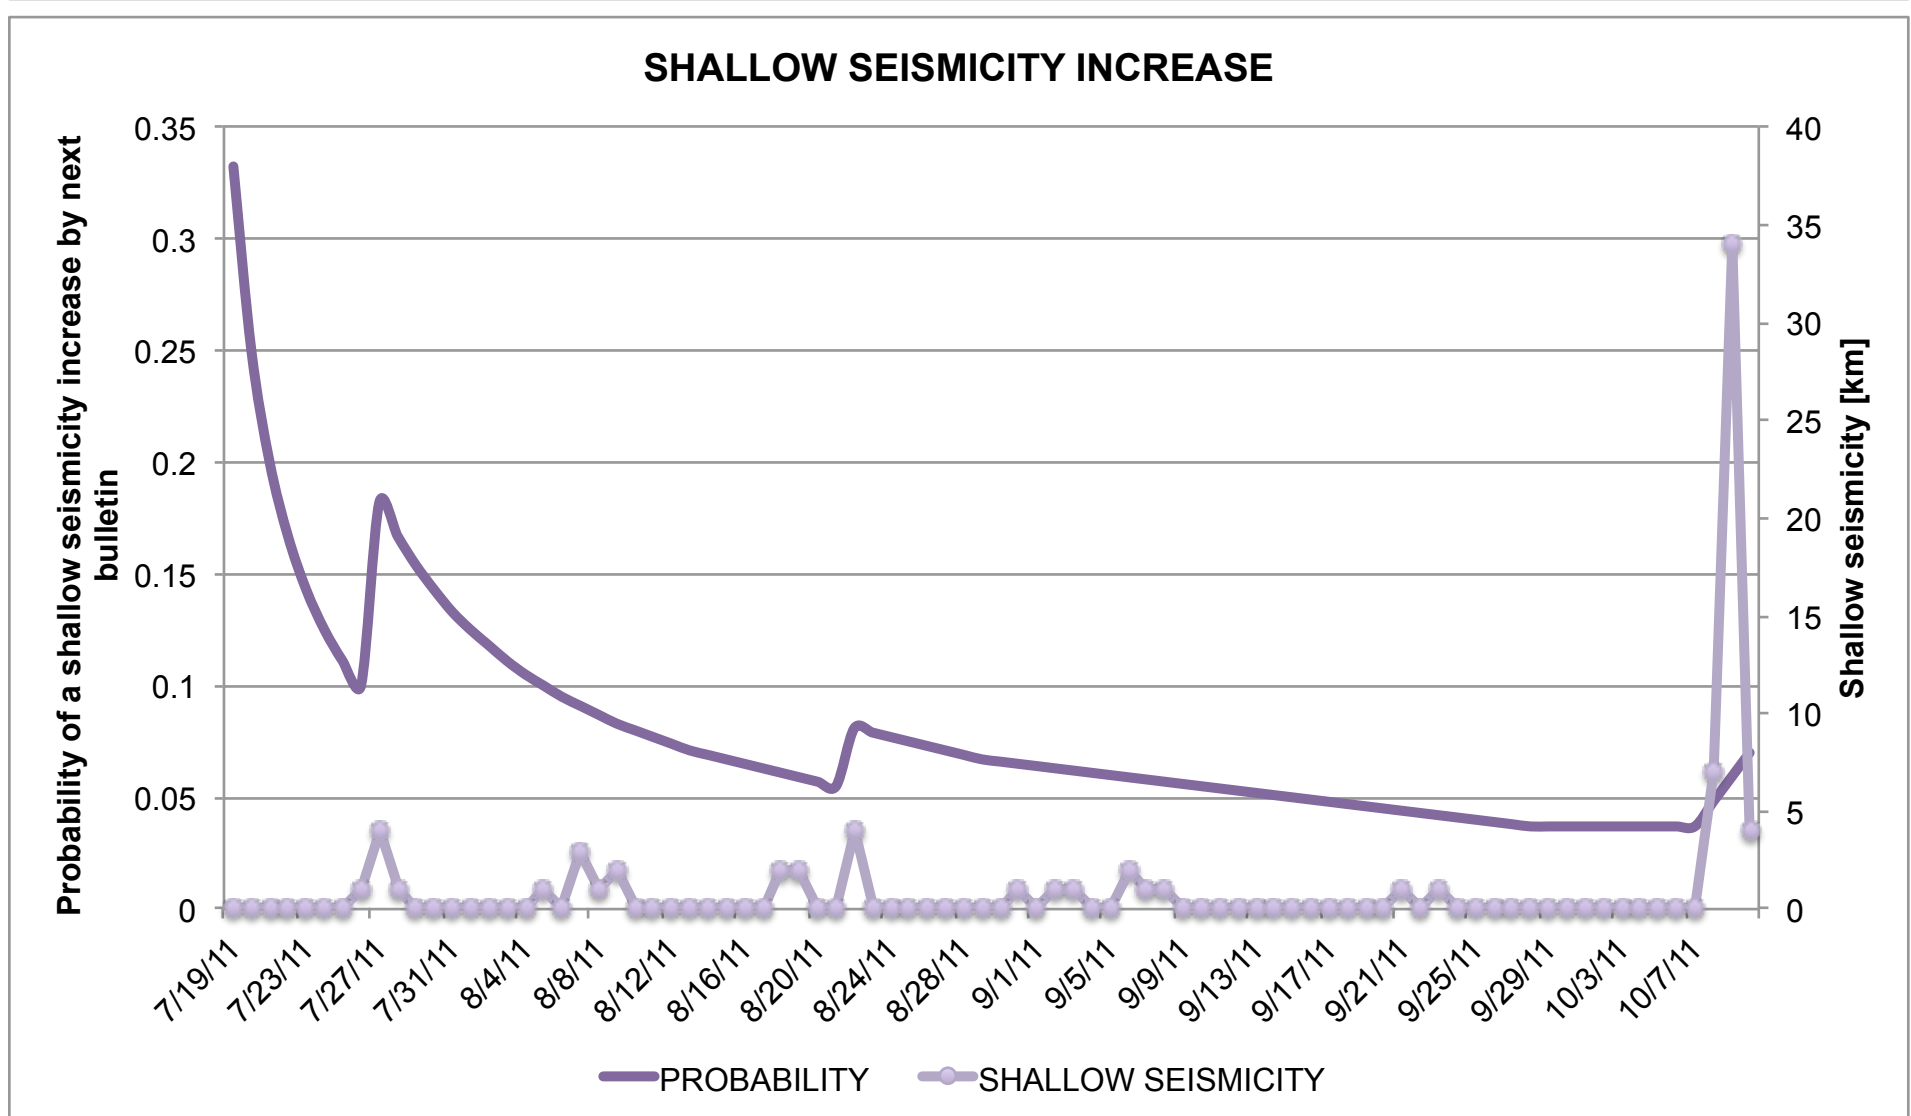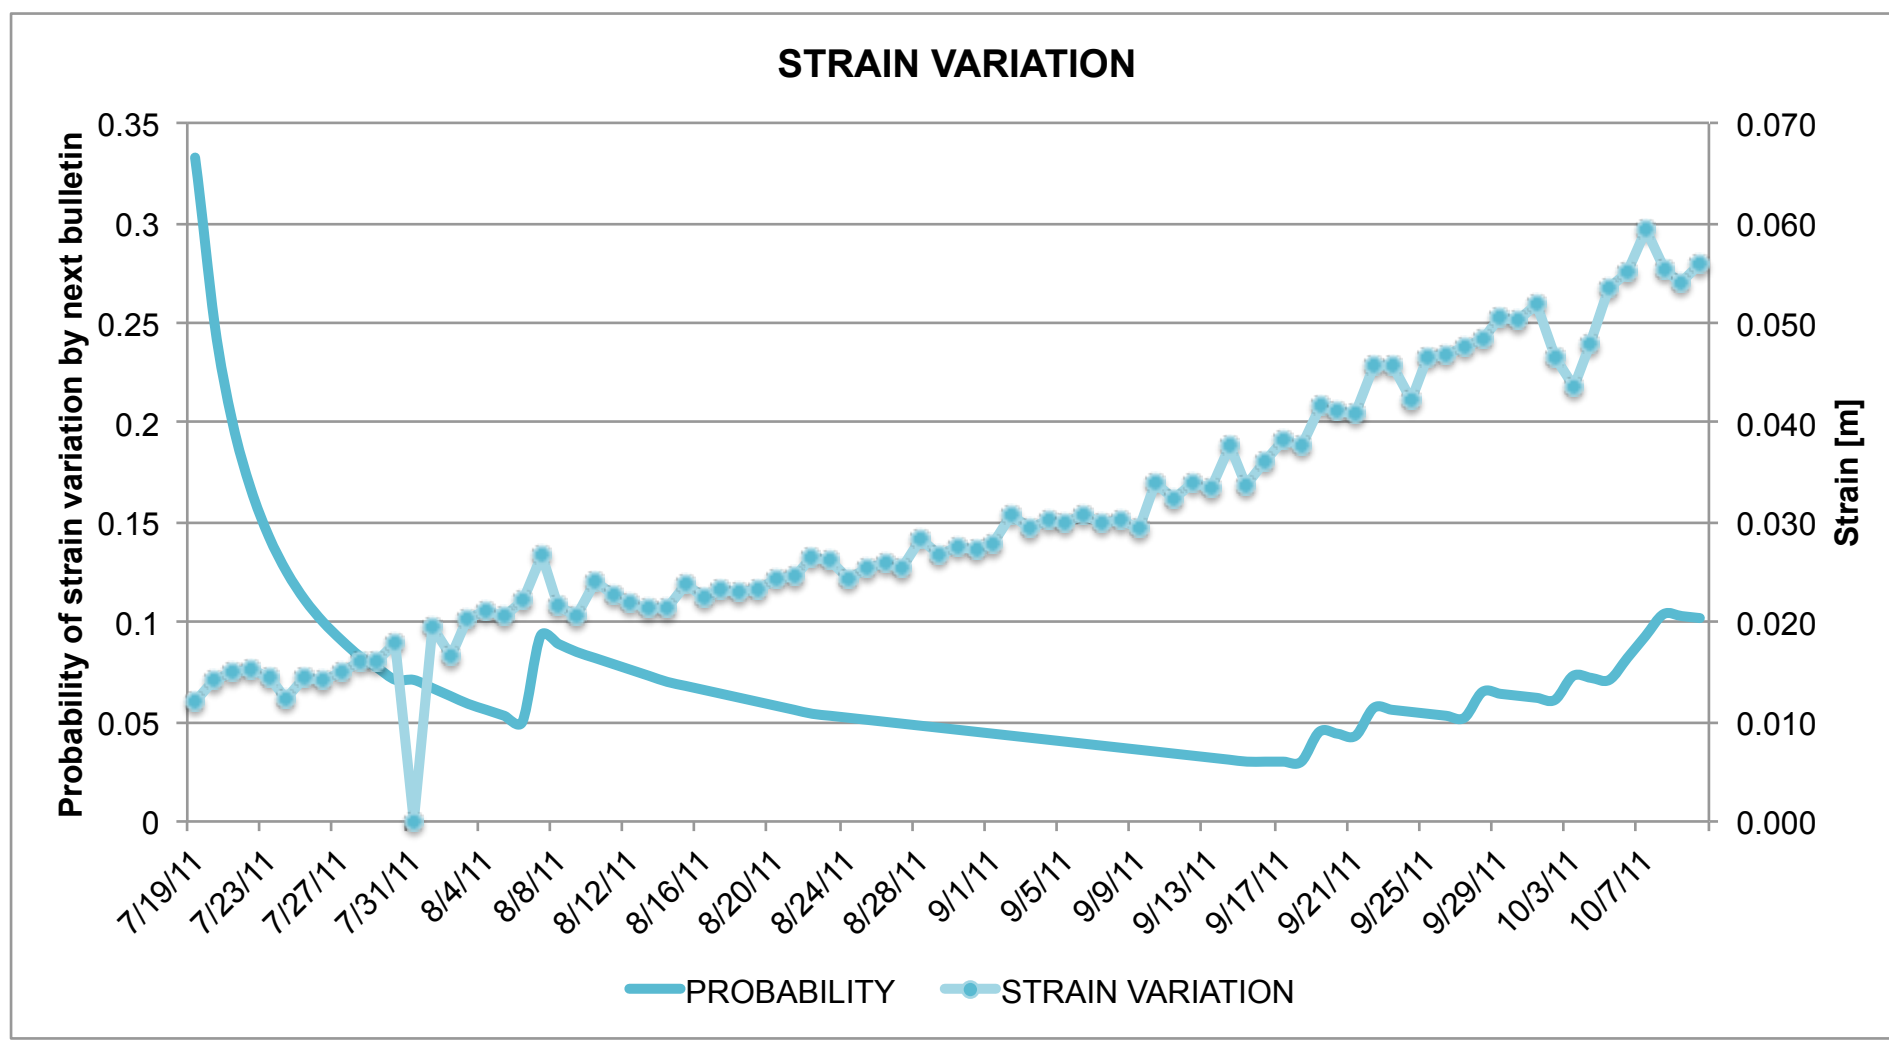

Supplement: Supplementary file 1 [file SupMaterial.pdf › Supp_Material_Bartolini_et_al/SupMaterial.pdf]
